# Supplementary material
Source: PubMed Central journal article supplement (PMC2755941)
Supplement: supp_M109.035766_jbc.M109.035766-1.pdf [file supp_M109.035766_jbc.M109.035766-1.pdf]

Suppl. Fig. 1

Normal cell

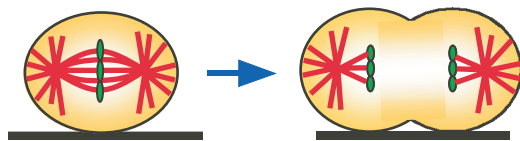

CagA-expressing cell

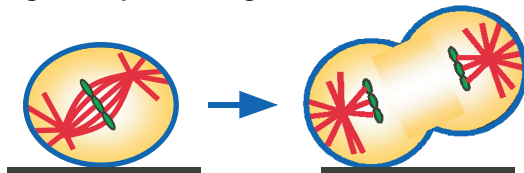

Supplementary Fig. 1. A model for destabilization of cell division axis by CagA. In normal cells, cell division axis is vertical to the culture dish and two daughter cells attach to the dish evenly. In CagA-expressing cells, however, cell division axis is destabilized due to the misorientation of mitotic spindle. Because proper alignment of the mitotic spindle is ensured by the astral microtubules, CagA may subvert the microtubule-based spindle positioning through inhibition of the PAR1 kinase. As a result, two daughter cells cannot attach to the dish evenly.
